# Supplementary material for: Low-bias phosphopeptide enrichment from scarce samples using plastic antibodies
Source: PubMed Central journal article supplement (PMC4486973; doi:10.1038/srep11438), 2015-07-01
Supplement: srep11438-s1.pdf [file srep11438-s1.pdf]

## Supplementary Information

### Low-bias phosphopeptide enrichment from scarce samples using plastic antibodies

Jing Chen<sup>[a]\*</sup>, Sudhirkumar Shinde<sup>[b]\*</sup>, Markus-Hermann Koch<sup>[a]</sup>, Martin Eisenacher<sup>[a]</sup>, Sara Galozzi<sup>[a]</sup>, Thilo Lerari<sup>[a]</sup>, Katalin Barkovits<sup>[a]</sup>, Prabal Subedi<sup>[a]</sup>, Reijko Krüger<sup>[c, d]</sup>, Katja Kuhlmann<sup>[a]</sup>, Börje Sellergren<sup>[b]\*</sup>, Stefan Helling<sup>[a]\*</sup> and Katrin Marcus<sup>[a]\*</sup>

#### Synthesis of molecularly imprinted polymers

N-(9-Fluorenylmethoxycarbonyloxy) succinimide (Fmoc-OSu) and serine ethyl ester hydrochloride (Ser-OEt HCl) were obtained from Bachem; benzyl alcohol (99%) was obtained from Across Organics, and N,N-diisopropylethyl amine (DIEA), tert-butyl hydroperoxide (5.0-6.0 M solution in decane), and tetrazole solution were obtained from Fluka. The base 1,2,2,6,6-pentamethylpiperidine (PMP) was purchased from Fluka (Buchs, Switzerland). The initiator *N,N'*-Azo-bis-(2,4-dimethyl)valeronitrile (ABDV) was purchased from Wako Chemicals (Neuss, Germany). HPLC-grade methanol (MeOH) and MeCN were purchased from Acros (Geel, Belgium). Fmoc-Ser(PO<sub>3</sub>H<sub>2</sub>)-OH and Fmoc-Tyr(PO<sub>3</sub>H<sub>2</sub>)-OH were purchased from Bachem AG Switzerland and had a declared purity of >97%. Pentaerythritol triacrylate (PETA) was purchased from Sigma-Aldrich (Steinheim, Germany).

#### **N-(9-Fluorenylmethoxycarbonyl) serine ethyl ester (Fmoc-Ser-OEt)**

Fmoc-OSu (5 g, 14.82 mmol) and serine ethyl ester hydrochloride (2.514 g, 14.822 mmol) were added to 20 ml of dry dichloromethane and stirred under nitrogen atmosphere. Afterwards, N,N-diisopropylethyl amine (2.579 g, 14.86 mmol) was added to the reaction mixture at 0°C and subsequently stirred at room temperature for 12 hours followed by washing steps with 1 M hydrochloric acid, saturated sodium bicarbonate, water and brine; the reaction was then dried over sodium sulfate. The solvent was evaporated, and the compound precipitated from n-hexane yielded 3.69 g of white product (68.6% yield). <sup>1</sup>H NMR (400 MHz CDCl<sub>3</sub>): δ 1.21-1.31 (t, 3H), 3.94-3.99 (d, 2H), 4.21 (m, 3H), 4.43-4.44 (m, 3H), 5.76-5.78 (d, 1H), 7.30-7.78 (m, 8H, Aromatic). <sup>13</sup>C NMR (100 MHz CDCl<sub>3</sub>): δ 14.28, 47.25, 56.22, 62.14, 63.52, 67.31, 120.12, 120.14, 125.20, 127.19, 127.22, 127.87, 141.41, 141.45, 143.77, 143.93, 156.38, 170.58. LCMS observed mass m/z: M+18 (355.14+18) 373.17.

### **Di-benzyl-N,N-diisopropylphosphoramidate**

Di-benzyl-N,N-diisopropylphosphoramidate was synthesized according to the procedure reported by Perich *et al.*<sup>1</sup> A solution of benzyl alcohol (0.02 mol) and triethyl amine (0.04 mol) in absolute diethyl ether (20 ml) was added slowly to a solution of (diisopropylamino) dichlorophosphine (0.01 mol) in 10 ml of absolute diethyl ether while maintaining the reaction temperature at 0°C. After complete addition, the solution was stirred at room temperature for 3 hours. The reaction mixture was then consecutively washed with 5% sodium bicarbonate and brine. After drying with anhydrous sodium sulfate, the solution was filtered and evaporated under reduced pressure, yielding 3.12 g of colorless liquid (90% yield). The obtained crude product was used for the subsequent reaction without further purification. <sup>1</sup>H NMR (400 MHz CDCl<sub>3</sub>): δ 1.20-1.22 (d, 12H), 3.66-3.75 (m, 2H), 4.67-4.89 (m, 4H), 7.24-7.38 (m, 10H). <sup>13</sup>C NMR (100 MHz CDCl<sub>3</sub>): 24.60, 24.67, 43.00, 43.12, 65.25, 65.43, 126.95, 127.19, 128.20, 139.45, 139.53. <sup>31</sup>P NMR (CDCl<sub>3</sub>): δ 148.55.

### **N-(9-fluorenylmethyloxycarbonyl)-O-phosphoserine ethyl ester (Fmoc-Ser(PO<sub>3</sub>H<sub>2</sub>)-OEt)**

Di-benzyl-N,N-diisopropylphosphoramidate (1.22 g, 3.532 mmol) dissolved in 5 ml of anhydrous tetrahydrofuran was added to a solution of Fmoc-Ser-OEt (0.5 g, 1.40 mmol) and tetrazole (9.38 ml, (0.45 M in acetonitrile, 4.22 mmol) in 15 ml of anhydrous tetrahydrofuran under nitrogen. The resulting solution was stirred at room temperature for 12 hours. *t*-Butyl hydroperoxide (1 ml of a 5-6 M solution in decane, 5 mmol) was added to this mixture at 0°C, and it was stirred for another 2 hours at 0°C. The reaction was further stirred at room temperature for an additional hour. After aqueous workup, the residue was dried and dissolved in 30 ml ethanol. A 10% Pd (weight %) on carbon (0.5 g) catalyst was then added, and the mixture was stirred under a hydrogen atmosphere more than 12 hours. The catalyst was removed over Celite, and the residue was further purified by silica gel column chromatography, eluted with chloroform:methanol:acetic acid 98:2:1. The purification yielded 0.302 g of a white compound (49% yield). <sup>1</sup>H NMR (400 MHz DMSO): δ 1.15-1.20 (t, 3H), 4.10-4.32 (m, 6H), 4.87-4.89 (m, 1H), 5.66 (s, 1H), 7.33-7.91 (m, 8H, aromatic). <sup>13</sup>C NMR (100 MHz, DMSO d<sub>6</sub>): 14.06, 46.58, 54.62, 60.97, 64.32, 66.02, 120.15, 125.32, 127.13, 127.69, 128.28. δ <sup>31</sup>P NMR (DMSO d<sub>6</sub>): δ 0.12 (s). δ <sup>31</sup>P NMR ((CD<sub>3</sub>)<sub>2</sub>CO+CD<sub>3</sub>OD): δ 0.66 (s). MALDI-TOF observed *m/z*, M+K<sup>+</sup>+H<sup>+</sup>, M+2Na<sup>+</sup>, M+Na<sup>+</sup>+K<sup>+</sup>, M+3Na<sup>+</sup>: 475.01, 481.1, 497.2 and 503.4, respectively; DESI-MS, M, M+H<sup>+</sup>, M+2H<sup>+</sup>, M+3H<sup>+</sup>: 435.2, 436.12, 437.1 and 438.12, respectively.

### **Polymer preparation**

The pY-MIP and pS-MIP were prepared following a similar protocol to that previously published.<sup>2</sup> In brief, the pS-MIP was prepared in the following manner. The bis-pentamethylpiperidine salt of Fmoc-pSer-OEt (template) (0.5 mmol), urea monomer (1

mmol), acrylamide (1 mmol) and pentaerythritol triacrylate PETA (13.3 mmol) were dissolved in tetrahydrofuran THF (5.6 ml) and the initiator azobis(2,4-dimethyl)valeronitrile (ABDV) (1% w/w of total monomers) was added to the solution. The solution was then transferred to a glass ampoule at 0°C, and the solution was purged with dry nitrogen for 10 minutes. The tubes were then flame-sealed while kept on ice, and polymerization was initiated by placing the tubes in a temperature-controlled water bath pre-set at 50°C. After 24 hours, the tubes were broken and the polymers were lightly crushed. They were thereafter washed 3 times with MeOH and extracted in a soxhlet apparatus with 1:1 methanol: 0.1 N HCl for 24 hours. This step was followed by further crushing and sieving, and the fraction from 36-50 µm was used for packing HPLC columns. A non-imprinted polymer (NIP) was prepared in the same manner as described above, but with the omission of the template molecule from the pre-polymerization solution. The polymers were characterized by nitrogen sorption analysis, swelling ratio measurement and by scanning electron microscopy (Supplementary Fig. 12) as reported elsewhere<sup>2-4</sup>.

### HPLC Evaluation

The 36-50-µm particle size fraction was sedimented repeatedly in 80:20 (v:v) MeOH:water to remove fine particles, and the slurry was then packed into HPLC columns (30 x 4.6 mm) using the same mixture as the pushing solvent. Subsequent analyses of the polymers were performed using an Agilent HP1050 or HP1100 system equipped with a diode array-UV detector and a workstation. Analyte detection was performed at 260 nm with a flow rate of 0.5 ml/min washing solution after injecting 5 µl of analyte stock solutions. The retention factor (k) was calculated as  $k = (t-t_0)/t_0$ , where t is retention time of the analyte and  $t_0$  = retention of the void marker (acetone). Prior to each run, the columns were washed with MeOH (supplemented with 0.1% TFA) for at least 2 hours and equilibrated for at least 20 minutes with the mobile phase.

### References

1. Perich J.W., Alewood P.F., Johns R.B. Synthesis of casein-related peptides and phosphopeptides. VII. The efficient synthesis of ser(P)-containing peptides by the use of Boc-SerPO<sub>3</sub>R<sub>2</sub>-OH derivatives. *Aust. J. Chem.* **44** (2), 233-252 (1991).
2. Shinde, S., Bunschoten, A., Kruijtz, J.A.W., Liskamp, R.M.J. & Sellergren, B. Imprinted polymers displaying high affinity for sulfated protein fragments. *Angew. Chem. Int. Ed. Engl.* **51**, 8326-8329 (2012).
3. Helling, S. *et al.* Ultratrace enrichment of tyrosine phosphorylated peptides on an imprinted polymer. *Anal. Chem.* **83**, 1862-1865 (2011).

4. Emgenbroich, M. *et al.* A phosphotyrosine-imprinted polymer receptor for the recognition of tyrosine phosphorylated peptides. *Chemistry*. **14**, 9516-9529 (2008)

## Supplementary Figures

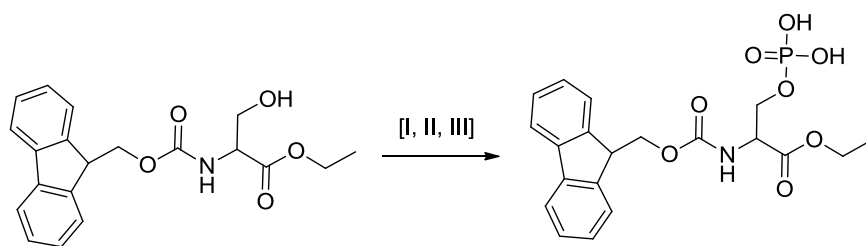

**Supplementary Fig. 1** | Synthesis of the template Fmoc-pSer-OEt. [I] Di-benzyl-N,N-diethylphosphoramidate/tetrazole. [II] t-BuOOH, 0 °C. [III] H<sub>2</sub>/ 10% Pd on charcoal.

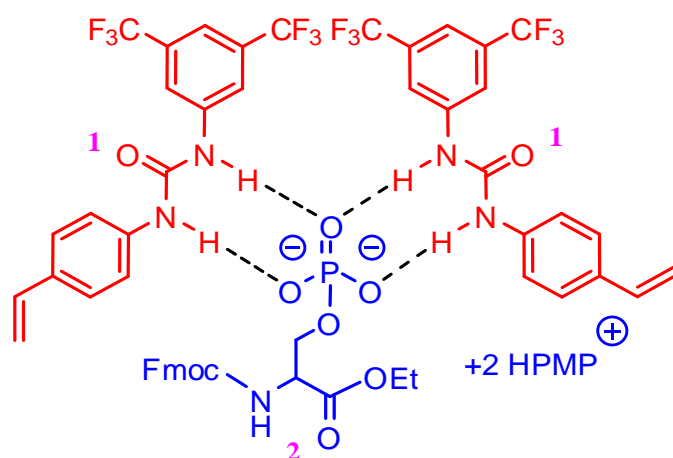

**Supplementary Fig. 2** | Proposed pre-polymerization complex of bis pentamethyl piperidinium of Fmoc-pSer-OEt (2) and urea monomer (1) in tetrahydrofuran.

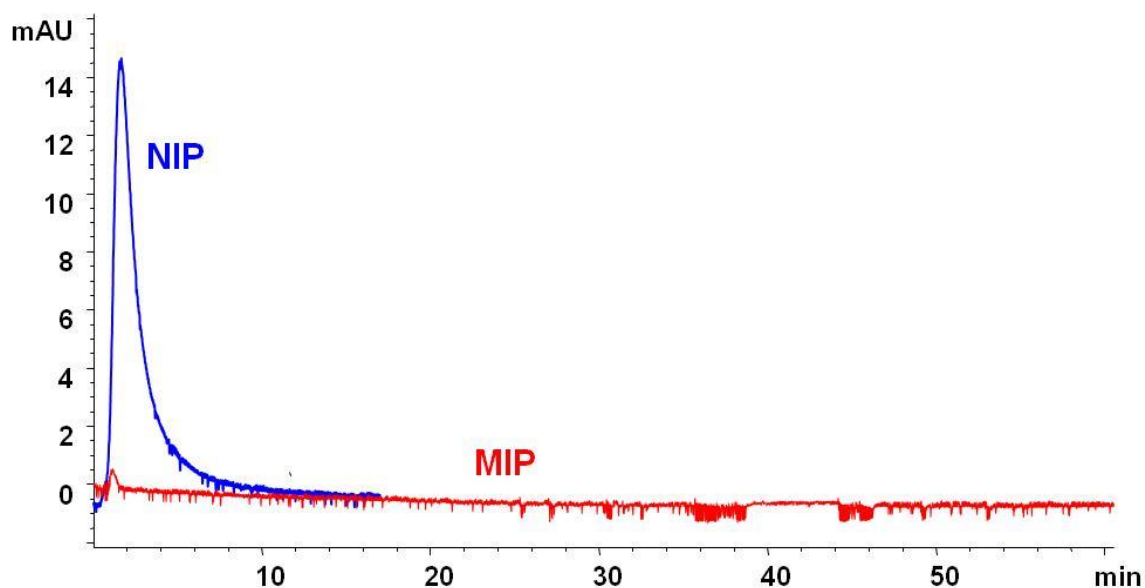

**Supplementary Fig. 3** | HPLC binding test of the phosphoserine derivative Fmoc-pSer-OH on MIP and NIP polymers in acidic buffered mobile phase (MeCN:water:TFA=95:5:0.1). Injection volume: 5  $\mu$ l; flow rate: 0.5 ml/min; DAD: 254 nm.

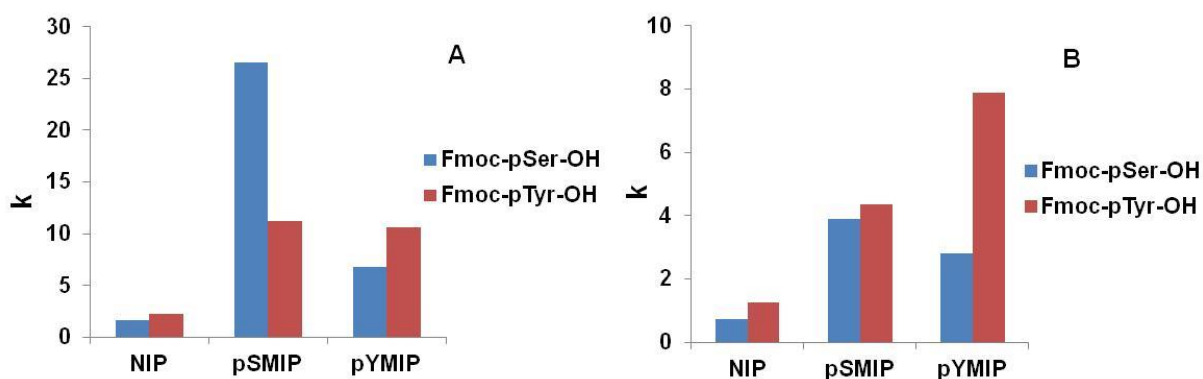

**Supplementary Fig. 4:** | Retention factor ( $k$ ) of Fmoc-protected amino acids injected onto pS- and pY- MIP and NIP columns using different mobile phases. (A) (MeCN:water:TFA=95:5:0.1) (B) (MeCN:water:TFA = 50:50:0.1). Injection volume: 5  $\mu$ l; flow rate: 0.5 ml/min; DAD: 254 nm.

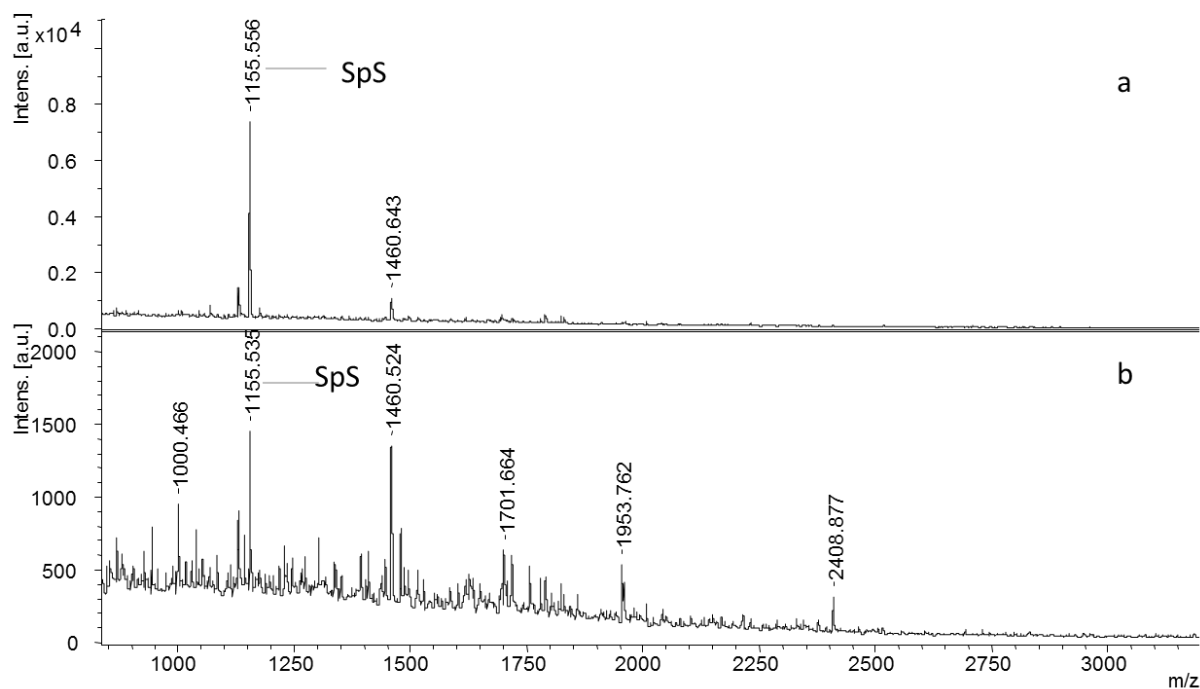

**Supplementary Fig. 5** | MALDI-TOF/TOF-MS spectra of pS-MIP-treated SPE fractions of 2 pmol SpS peptide spiked into 1.68 µg digested mouse brain lysate. (a) Elution fraction; (b) flow-through fraction. The presence of SpS indicates overloading.

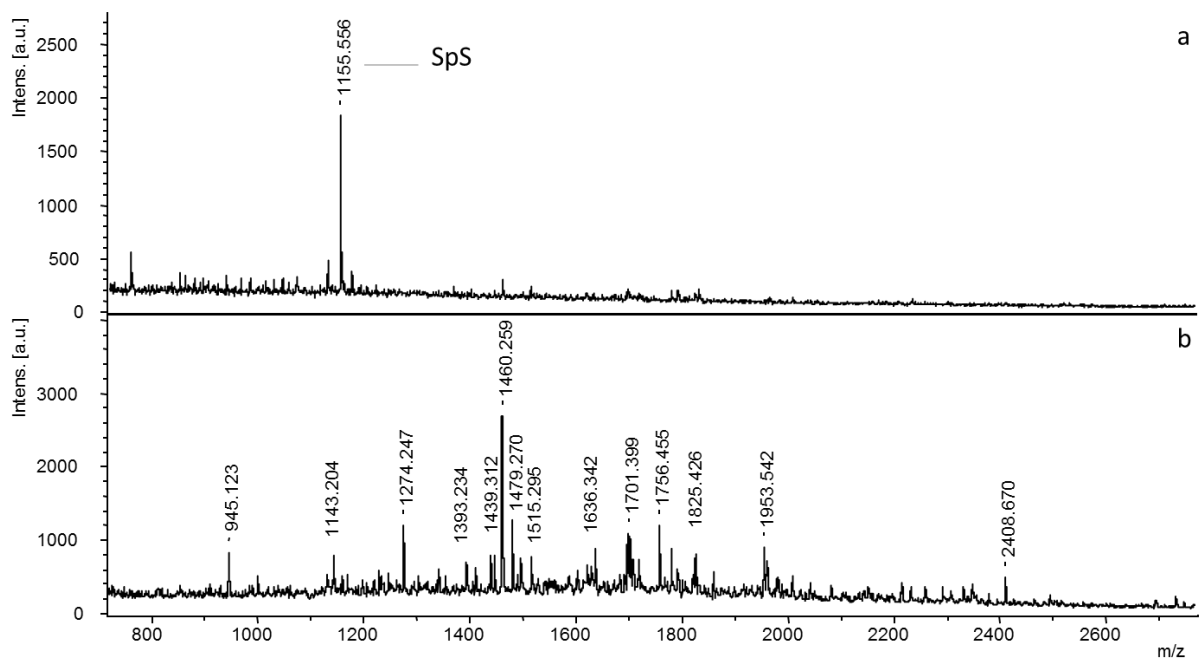

**Supplementary Fig. 6** | MALDI-TOF/TOF-MS spectra of pS-MIP SPE fractions of 1 pmol SpS peptide spiked into 1.68 µg digested mouse brain lysate. (a) Elution fraction; (b) flow-through fraction.

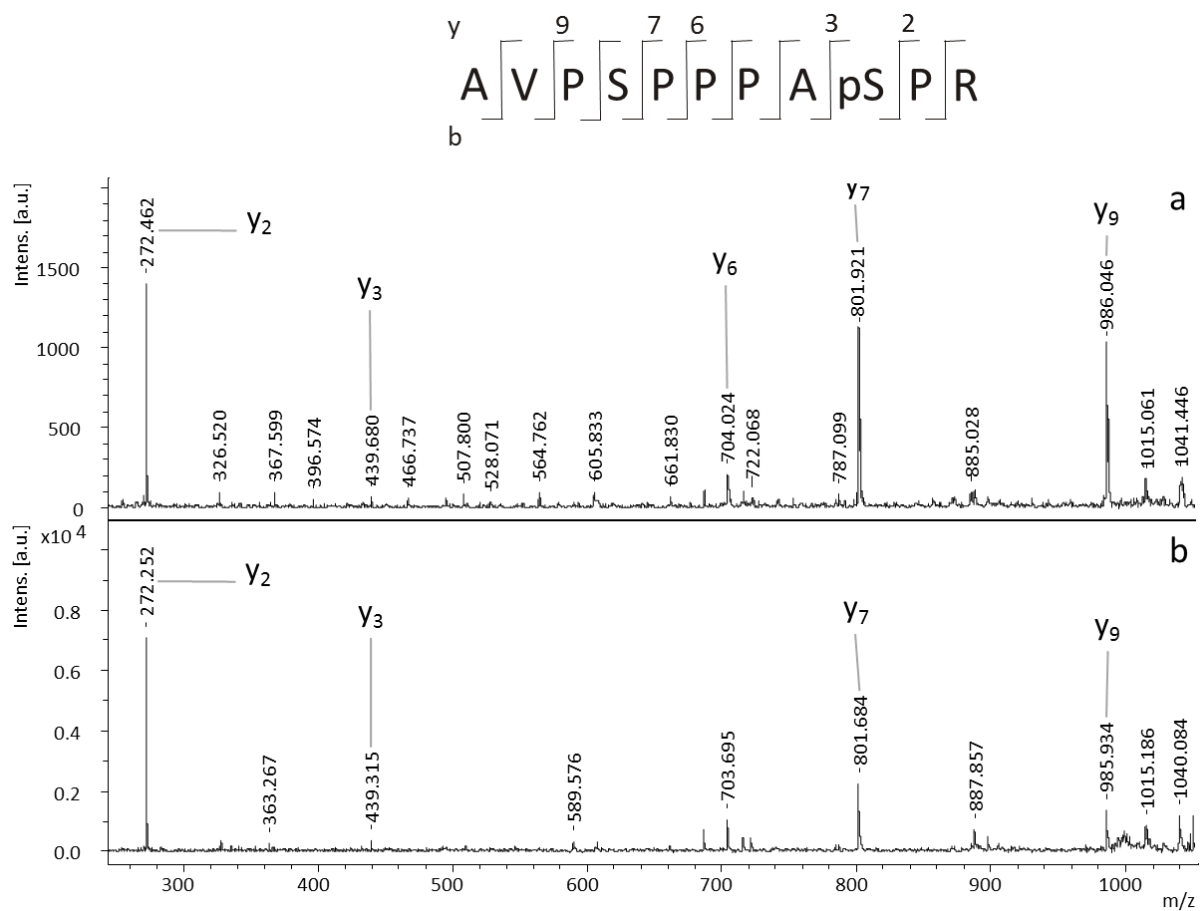

**Supplementary Fig. 7** | MALDI-TOF/TOF-MS/MS spectra for confirming the identity of SpS  $m/z=1155.556$ , as assisted by theoretical fragment interpretation and by reference examinations using MS/MS fragmentation of the pure peptide. (a) MS/MS fragmentation of the standard peptide precursor ion. (b) MS/MS fragmentation of the precursor ion in the elution fraction of the 2 pmol spiking experiment.



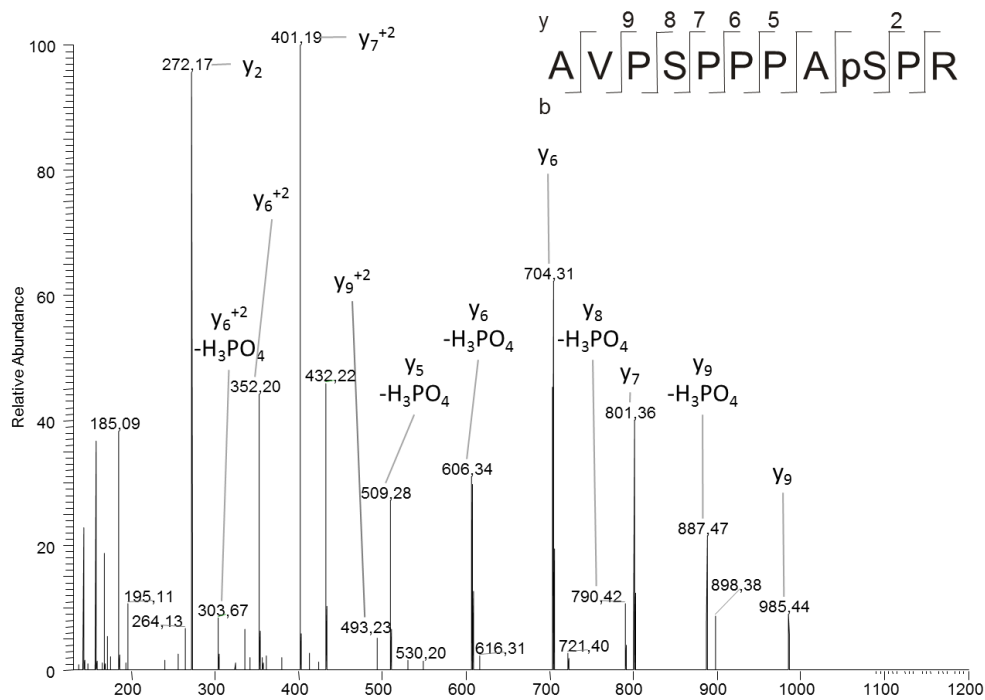

**Supplementary Fig. 8** | NanoLC-ESI-MS/MS spectrum of the pS-MIP elution fraction after loading a sample with 100 fmol of SpS peptide spiked into 1.68  $\mu$ g of mouse brain lysate. SpS:lysate = 6.8:10,000 (w/w).

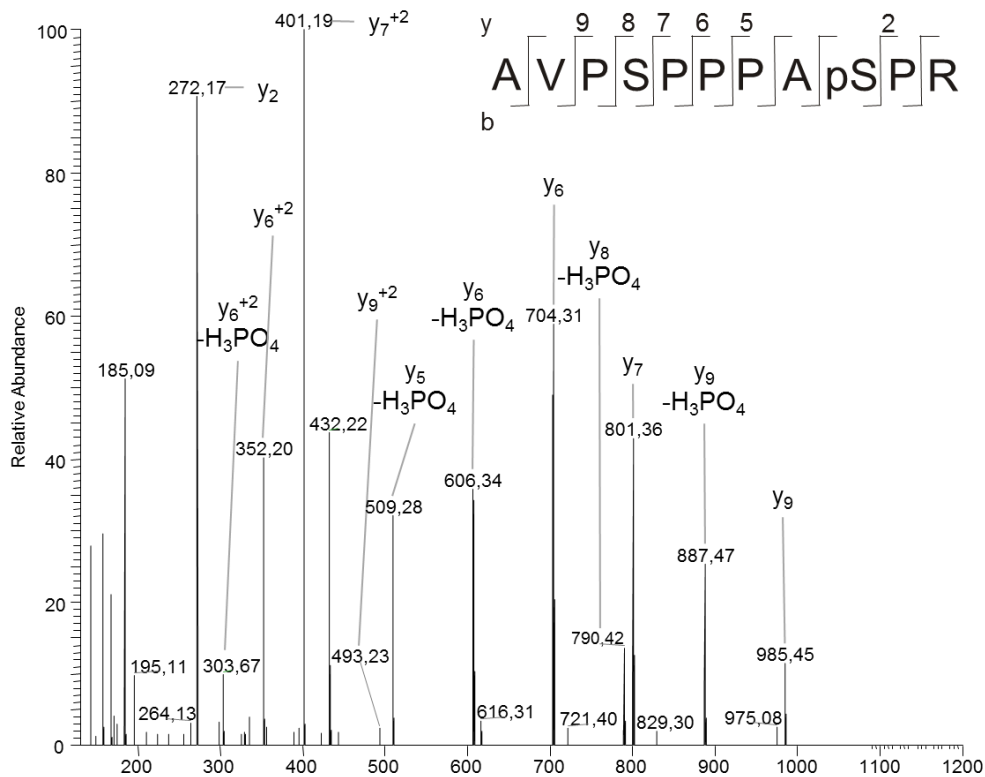

**Supplementary Fig. 9** | NanoLC-ESI-MS/MS spectrum of the pS-MIP elution fraction after loading a sample with 50 fmol SpS peptide spiked into 1.68  $\mu$ g mouse brain lysate. SpS:lysate = 3.4:10,000 (w/w).

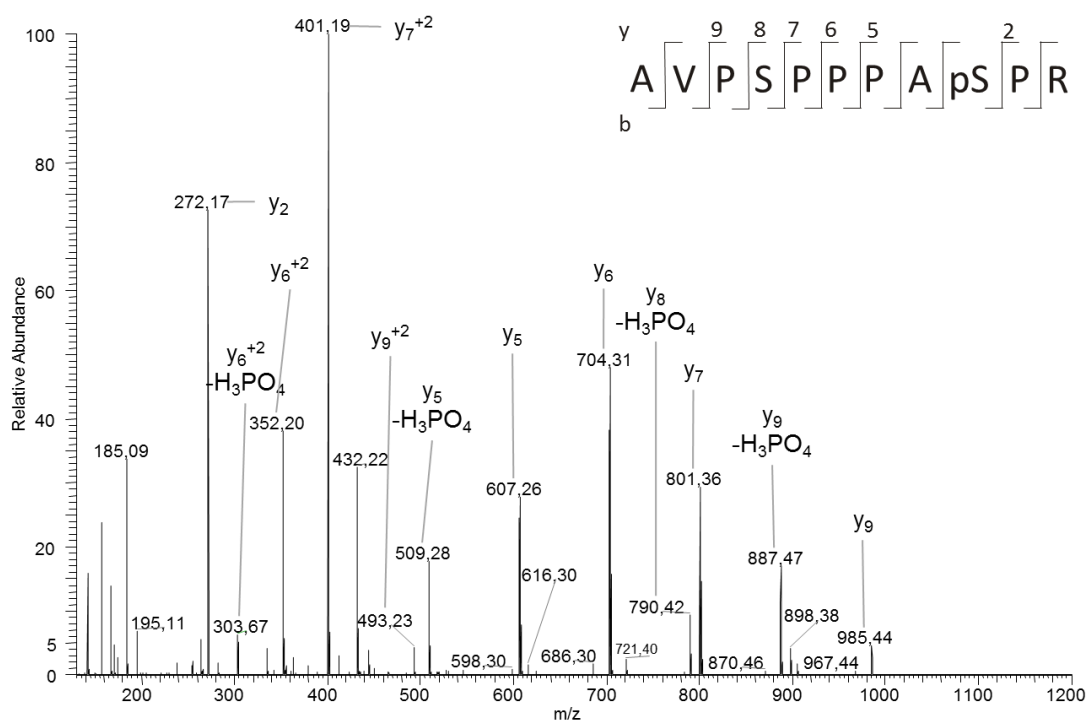

**Supplementary Fig. 10** | NanoLC-ESI-MS/MS spectrum of the pS-MIP elution fraction after loading a sample with 10 fmol SpS peptide spiked into 1.68  $\mu$ g mouse brain lysate. SpS:lysate = 6.8:100,000 (w/w).

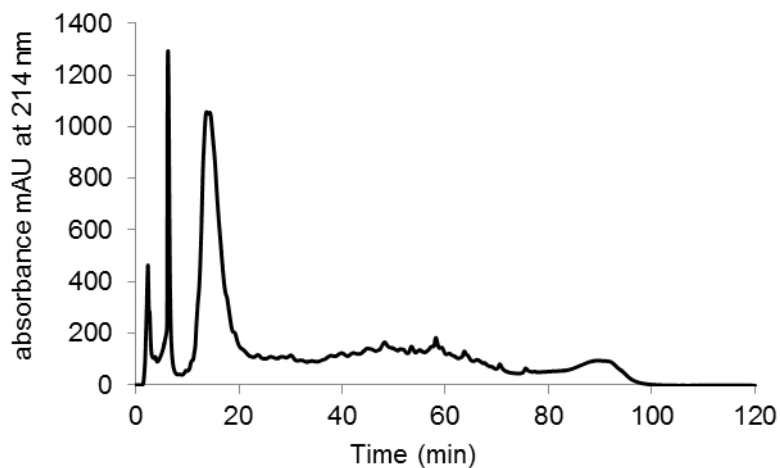

**Supplementary Fig. 11** | Representative chromatogram after strong cation exchange (SCX) chromatography of tryptically digested HEK 293T cell lysates. The fraction eluting between 4 and 40 minutes was collected and used for subsequent pS-MIP SPE or for direct determination of the phosphopeptide content.

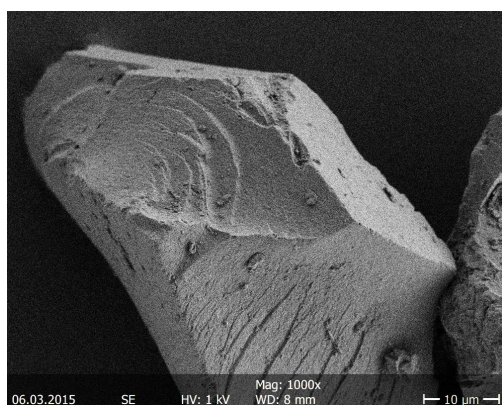

A.

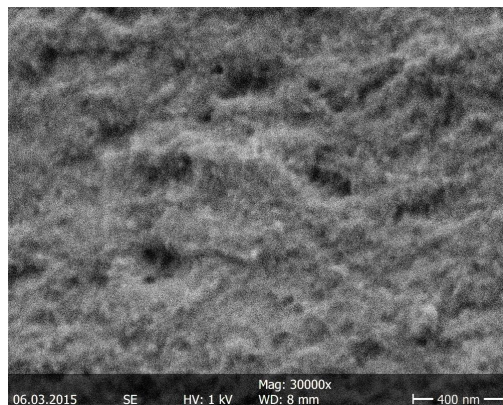

B.

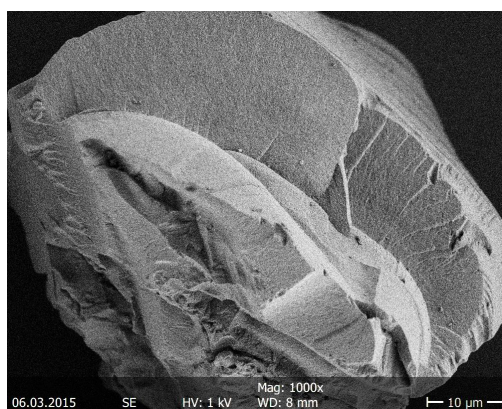

C.

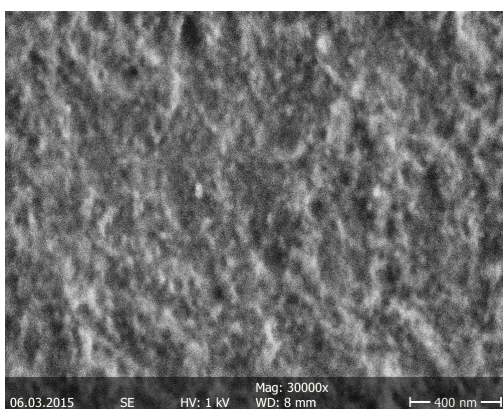

D.

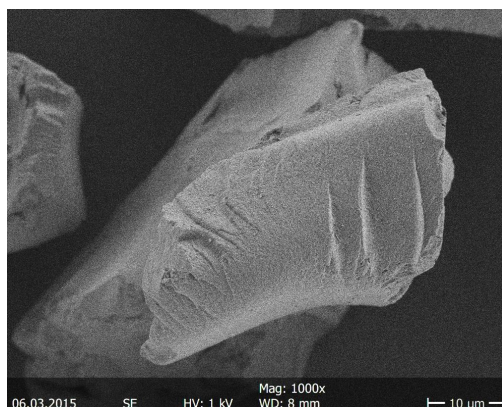

E.

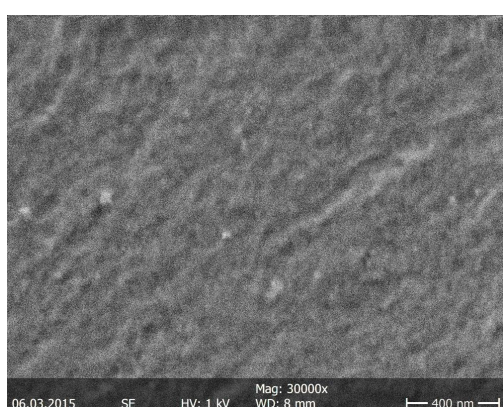

F.

**Supplementary Fig. 12** | Scanning electron micrographs (SEM) of the pS-MIP (A, B), pY-MIP (C, D) and nonimprinted polymer NIP (E, F) at 1000x (A, C, E) and 30000x (B, D, F) magnification. BET specific surface areas of the polymers: pY-MIP: 23 m<sup>2</sup>/g; pS-MIP: 11 m<sup>2</sup>/g. Swelling ratio in MeCN/water: 95/5: pY-MIP: 1.72; pS-MIP: 1.33; NIP: 1.66.

**Supplementary Table 1** | Tyrosine- and serine-containing model peptides used to probe phosphopeptide selectivity by SPE using pY-MIPs and/or pS-MIPs.

| <u>Peptide Sequence</u>                    | <u>Abbreviation</u> | <u>[M+H]<sup>+</sup></u> |
|--------------------------------------------|---------------------|--------------------------|
| VIL <b>GpS</b> PAHR                        | <b>GpS</b>          | 1029.5241                |
| DRVYIHPF                                   | <b>Y</b>            | 1046.5418                |
| DRV <b>pS</b> IHPF                         | <b>pS</b>           | 1050.4768                |
| GADDSYYTAR                                 | <b>YY</b>           | 1118.475                 |
| DRV <b>pY</b> IHPF                         | <b>pY</b>           | 1126.5081                |
| AVP <b>S</b> PPPA <b>pS</b> PR             | <b>SpS</b>          | 1155.5558                |
| GADDS <b>YpY</b> TAR                       | <b>YpY</b>          | 1198.4412                |
| GADDS <b>pYpY</b> TAR                      | <b>pYpY</b>         | 1278.4076                |
| WWG <b>S</b> GPS <b>S</b> GG <b>S</b> GGGK | <b>4S</b>           | 1420.624                 |
| WWG <b>S</b> G <b>pS</b> GG <b>pS</b> GGGK | <b>2S2pS</b>        | 1580.5567                |
| TRDIYETD <b>Y</b> YRK                      | <b>3Y</b>           | 1622.7809                |
| TRD <b>pY</b> ETD <b>pYpY</b> YRK          | <b>3pY</b>          | 1862.6799                |

**Supplementary Table 2** | Motif-X result for pS-MIP- and TiO<sub>2</sub>-specific phosphopeptides using a motif length of 7, occurrences of 20, a S central residue and significance of 0.0005.

| Dataset name     | Motif   | Motif score | FG matches | FG size at start of step | BG matches | BG size at start of step | Fold increase | % FG explained |
|------------------|---------|-------------|------------|--------------------------|------------|--------------------------|---------------|----------------|
| pS-MIP           | ...SP.. | 4.92        | 114        | 219                      | 196        | 519                      | 1.38          | 52             |
| TiO <sub>2</sub> | ...S..E | 3.39        | 95         | 213                      | 173        | 519                      | 1.34          | 45             |
| TiO <sub>2</sub> | ...SE.. | 3.72        | 22         | 118                      | 29         | 346                      | 2.22          | 10             |

**Supplementary Table 3** |  $\chi^2$ -testing ((FG/BG) versus (motif matches/motif does not match)) for all three motifs depicted in Supplementary Table 2. Counts were taken directly from Supplementary Table 2.

|                                 | Motif match                 | No motif match                     |
|---------------------------------|-----------------------------|------------------------------------|
| FG (pS-MIP), ...SP..            | 114                         | 105                                |
| BG (all), ...SP..               | 196                         | 323                                |
|                                 | $p_{\text{yates}} = 0.04\%$ | $p_{\text{FDR adjusted}} = 0.13\%$ |
| FG (TiO <sub>2</sub> ), ...S..E | 95                          | 118                                |
| BG (all), ...S..E               | 173                         | 346                                |
|                                 | $p_{\text{yates}} = 0.53\%$ | $p_{\text{FDR adjusted}} = 0.53\%$ |
| FG (TiO <sub>2</sub> ), ...SE.. | 22                          | 96                                 |
| BG (all), ...SE..               | 29                          | 317                                |
|                                 | $p_{\text{yates}} = 0.36\%$ | $p_{\text{FDR adjusted}} = 0.53\%$ |

**Supplementary Table 4** | Repeatable nanoLC-ESI-MS/MS-identified phosphopeptides present in all pS-MIP and TiO<sub>2</sub> SPE experiments.

| Sequence                     | Accession     | PSM | Modification            | PhosphoRS 3.1 Site probabilities*                                                               | Ion score <sup>§</sup> | [M+H] <sup>+1</sup> |
|------------------------------|---------------|-----|-------------------------|-------------------------------------------------------------------------------------------------|------------------------|---------------------|
| SSSPAPADIAQTVQEDLR           | Q13283        | 69  | S3(Phosp)               | S(1): 0.4; S(2): 0.4; S(3): 99.2; T(12): 0.0                                                    | 94                     | 1964.89702          |
| SASDTSSEELNSQDSPPK           | O14745        | 47  | S3(Phosp)               | S(1): 0.4; S(3): 99.6; S(4): 0.0; T(6): 0.0; S(7): 0.0; S(12): 0.0; S(15): 0.0                  | 113                    | 1958.78569          |
| EGEPTVYSDEEEKPKDESAR         | O00264        | 45  | S9(Phosp)               | T(6): 0.0; Y(8): 0.0; S(9): 100.0; S(18): 0.0                                                   | 49                     | 2375.9395           |
| HTGPNSPDTANDGFVR             | P31943;P55795 | 44  | S6(Phosp)               | T(2): 0.0; S(6): 100.0; T(9): 0.0                                                               | 81                     | 1764.73381          |
| FASDDEHDEHDENGATGPVK         | P05455        | 39  | S3(Phosp)               | S(3): 100.0; T(16): 0.0                                                                         | 86                     | 2249.8604           |
| ESEDKPEIEDVGSDEEEEEK         | P07900        | 36  | S13(Phosp)              | S(2): 0.0; S(13): 100.0                                                                         | 55                     | 2400.98223          |
| YGLQDSDEEEEEEHPSK            | P52948        | 32  | S6(Phosp)               | Y(1): 0.0; S(6): 100.0; S(15): 0.0                                                              | 69                     | 1971.74504          |
| KPVTVSPTTPTSPTEGEAS          | Q9Y6G9        | 32  | S12(Phosp)              | T(4): 0.0; S(6): 0.0; T(8): 0.0; T(9): 0.0; T(11): 0.0; S(12): 99.4; T(14): 0.6; S(19): 0.0     | 40                     | 1965.90679          |
| FEEESKEPVADEEEEDSDDDVEPITEFR | P54105        | 32  | S17(Phosp)              | S(5): 0.0; S(17): 100.0; T(25): 0.0                                                             | 107                    | 3394.35385          |
| ESEDKPEIEDVGSDEEEEEK         | P07900        | 31  | S13(Phosp)              | S(2): 0.0; S(13): 100.0                                                                         | 48                     | 2272.8897           |
| NKPGPNIESGNEDDDASFK          | O60841        | 30  | S9(Phosp)               | S(9): 100.0; S(17): 0.0                                                                         | 47                     | 2113.87139          |
| GNSRPGTPSAEGGSTSSTLR         | P35269        | 25  | S3(Phosp);<br>T7(Phosp) | S(3): 100.0; T(7): 100.0; S(9): 0.0; S(14): 0.0; T(15): 0.0; S(16): 0.0; S(17): 0.0; T(18): 0.0 | 70                     | 2078.85624          |
| VFDDESDEKEDEEYADEK           | O43719        | 23  | S6(Phosp)               | S(6): 100.0; Y(14): 0.0                                                                         | 91                     | 2271.83306          |
| FNDSEGDDTEETEDYR             | Q9NYF8        | 21  | S4(Phosp)               | S(4): 100.0; T(9): 0.0; T(12): 0.0; Y(15): 0.0                                                  | 112                    | 2001.68633          |
| SPVSTRPLPSASQK               | Q8ND56        | 21  | S1(Phosp)               | S(1): 100.0; S(4): 0.0; T(5): 0.0; S(10): 0.0; S(12): 0.0                                       | 46                     | 1534.76201          |
| DHSPTPSVFNSDEER              | Q6UN15        | 19  | S3(Phosp)               | S(3): 100.0; T(5): 0.0; S(7): 0.0; S(11): 0.0                                                   | 61                     | 1796.71306          |
| SPVPSAFSDQSR                 | Q9UQ35        | 14  | S1(Phosp)               | S(1): 100.0; S(5): 0.0; S(8): 0.0; S(11): 0.0                                                   | 50                     | 1357.57854          |

PSM: peptide spectra match; \*: probabilities of amino acid phosphorylation in %; §: maximal ion score of the Mascot search algorithm

**Supplementary Table 5** | NanoLC-ESI-MS/MS-identified phosphopeptides present in a human CSF sample treated with SCX+pS-MIP, compared with the TiO<sub>2</sub> approach.<sup>3</sup>

| Sequence                  | found by TiO <sub>2</sub> | Protein name                      | Protein Group Accessions | Modifications             |
|---------------------------|---------------------------|-----------------------------------|--------------------------|---------------------------|
| GREEHYEEEEEEEDGAAVAEK     | no                        | Golgi integral membrane protein 4 | O00461                   | Y6(Phosp)                 |
| VTEPISAESGEQVER           | yes                       | Apolipoprotein L1                 | O14791                   | T2(Phosp)                 |
| EALQSEEDVEEVKEEDTEQKR     | yes                       | Extracellular matrix protein 2    | O94769                   | S5(Phosp)                 |
| EALQSEEDVEEVKEEDTEQK      | yes                       |                                   | O94769                   | S5(Phosp)                 |
| LVGGPMDASVEEEGVR          | yes                       | Cystein C                         | P01034                   | M6(Oxidation); S9(Phosp)  |
| VYACEVTHQGLSSPVTK         | no                        | Ig kappa chain C region           | P01834                   | Y2(Phosp)                 |
| AATVGLSLAGQPLQER          | no                        | Apolipoprotein E                  | P02649                   | T3(Phosp)                 |
| KVPQVSTPTLVEVSR           | no                        | Serum Albumin                     | P02768                   | T7(Phosp)                 |
| ERADEPQWSLYPSDSQVSEEVK    | no                        | Secretogranin-1                   | P05060                   | S13(Phosp)                |
| GHPQEESEESNVSMASLGEK      | yes                       |                                   | P05060                   | S7(Phosp); M14(Oxidation) |
| GEDSSEEKHLEEPGETQNAFLNER  | yes                       |                                   | P05060                   | S5(Phosp)                 |
| GEDSSEEKHLEEPGETQNAFLNER  | yes                       |                                   | P05060                   | S4(Phosp); S5(Phosp)      |
| SAEFPDFYDSEEPVSTHQAENEKDR | yes                       |                                   | P05060                   | S1(Phosp)                 |
| SQEESEEGEEDATSEVDKRR      | yes                       |                                   | P05060                   | S1(Phosp)                 |
| SQEESEEGEEDATSEVDKR       | yes                       |                                   | P05060                   | S5(Phosp)                 |
| VESLEQEAANER              | yes                       | Amyloid beta A4                   | P05067                   | S3(Phosp)                 |

|                            |     |                                              |        |                                          |
|----------------------------|-----|----------------------------------------------|--------|------------------------------------------|
| KANDESNEHSDVIDSQELSK       | no  | Osteopontin                                  | P10451 | S6(Phosp)                                |
| ANDESNEHSDVIDSQELSK        | yes |                                              | P10451 | S5(Phosp); S14(Phosp)                    |
| ANDESNEHSDVIDSQELSK        | yes |                                              | P10451 | S5(Phosp)                                |
| ANDESNEHSDVIDSQELSKVSR     | yes |                                              | P10451 | S14(Phosp)                               |
| DSYETSQLDDQSAETHSHK        | yes |                                              | P10451 | S2(Phosp)                                |
| AIPVAQDLNAPSDWDSR          | yes |                                              | P10451 | S16(Phosp)                               |
| QNLLAPQNAVSSEETNDFKQETLPSK | yes |                                              | P10451 | S11(Phosp)                               |
| QNLLAPQNAVSSEETNDFKQETLPSK | yes |                                              | P10451 | S11(Phosp); S12(Phosp)                   |
| QNLLAPQNAVSSEETNDFK        | yes |                                              | P10451 | S12(Phosp)                               |
| EDSLEAGLPLQVR              | no  | Chromogranin-A                               | P10645 | S3(Phosp)                                |
| VTTVASHTSDSDVPSGVTEVVVK    | no  | Clusterin                                    | P10909 | S11(Phosp)                               |
| EILSVDCSTNNPSQAK           | no  |                                              | P10909 | S4(Phosp)                                |
| LEPEDEESDADYDYQNR          | no  | Coagulation Factor                           | P12259 | S8(Phosp)                                |
| QQAHKKEESSPDYNPYQGVSVPLQKQ | no  | Secretogranin-2                              | P13521 | S8(Phosp)                                |
| EESSPDYNPYQGVSVPLQKQ       | no  |                                              | P13521 | S4(Phosp)                                |
| IESQTQEEVRDSKENIEK         | yes |                                              | P13521 | S12(Phosp)                               |
| QEVNPVRQEIESETTSEEQIQEEK   | yes | Versican core protein                        | P13611 | T15(Phosp)                               |
| ESAEVEEIVFPR               | yes | Cadherin-2                                   | P19022 | S2(Phosp)                                |
| SLPGESEEMMEEVDQVTLYSYK     | no  | Inter-alpha-trypsin inhibitor heavy chain H2 | P19823 | S6(Phosp); M9(Oxidation); M10(Oxidation) |
| DLYANTVLSGGTTMYPGIADR      | no  | Actin, cytoplasmic                           | P60709 | T13(Phosp)                               |
| AQRLSQETEALGR              | no  | Nucleobindin-1                               | Q02818 | S5(Phosp)                                |

|                                  |     |                                               |        |                                           |
|----------------------------------|-----|-----------------------------------------------|--------|-------------------------------------------|
| EHANSKQEEDNTQSDDILEESDQPTQVSK    | no  | SPARC-like protein 1                          | Q14515 | S14(Phosp)                                |
| HSASDDYFIPSQAFLEAER              | no  |                                               | Q14515 | S11(Phosp)                                |
| MQEDEFDQGNQEEDNSNAEMEEENASNVNK   | yes |                                               | Q14515 | M1(Oxidation); S17(Phosp); M21(Oxidation) |
| DQGNQEQDPNISNGEEEEKEPGEVGTNDNQER | yes |                                               | Q14515 | S12(Phosp)                                |
| FLDEVQAYSNVNK                    | no  | Rho GTPase-activating protein 22              | Q7Z5H3 | Y8(Phosp); S9(Phosp)                      |
| LRGEDDYNMDENEAESETDKQAALAGNDR    | no  | Golgi integral membrane protein 1             | Q8NBJ4 | M9(Oxidation); S16(Phosp)                 |
| ELSAERPLNEQIAEAEEDK              | yes | Secretogranin-3                               | Q8WXD2 | S3(Phosp)                                 |
| ELSAERPLNEQIAEAEEDKIK            | yes |                                               | Q8WXD2 | S3(Phosp)                                 |
| SEHPSSLSSEEETAGVENVK             | no  | Receptor-type tyrosine-protein phosphatase N2 | Q92932 | S10(Phosp)                                |
